# Supplementary material for: The role of egg-nest contrast in the rejection of brood parasitic eggs
Source: Oxford University Press journal article supplement (doi:10.1242/jeb.108449), 2015-01-01
Supplement: jeb108449supp.pdf [file jeb108449supp.pdf]

## Title

The role of egg-nest contrast in the rejection of brood parasitic eggs

## Authors

Aidala Z, Croston R, Schwartz J, Tong L, Hauber ME

## SUPPLEMENTARY MATERIALS

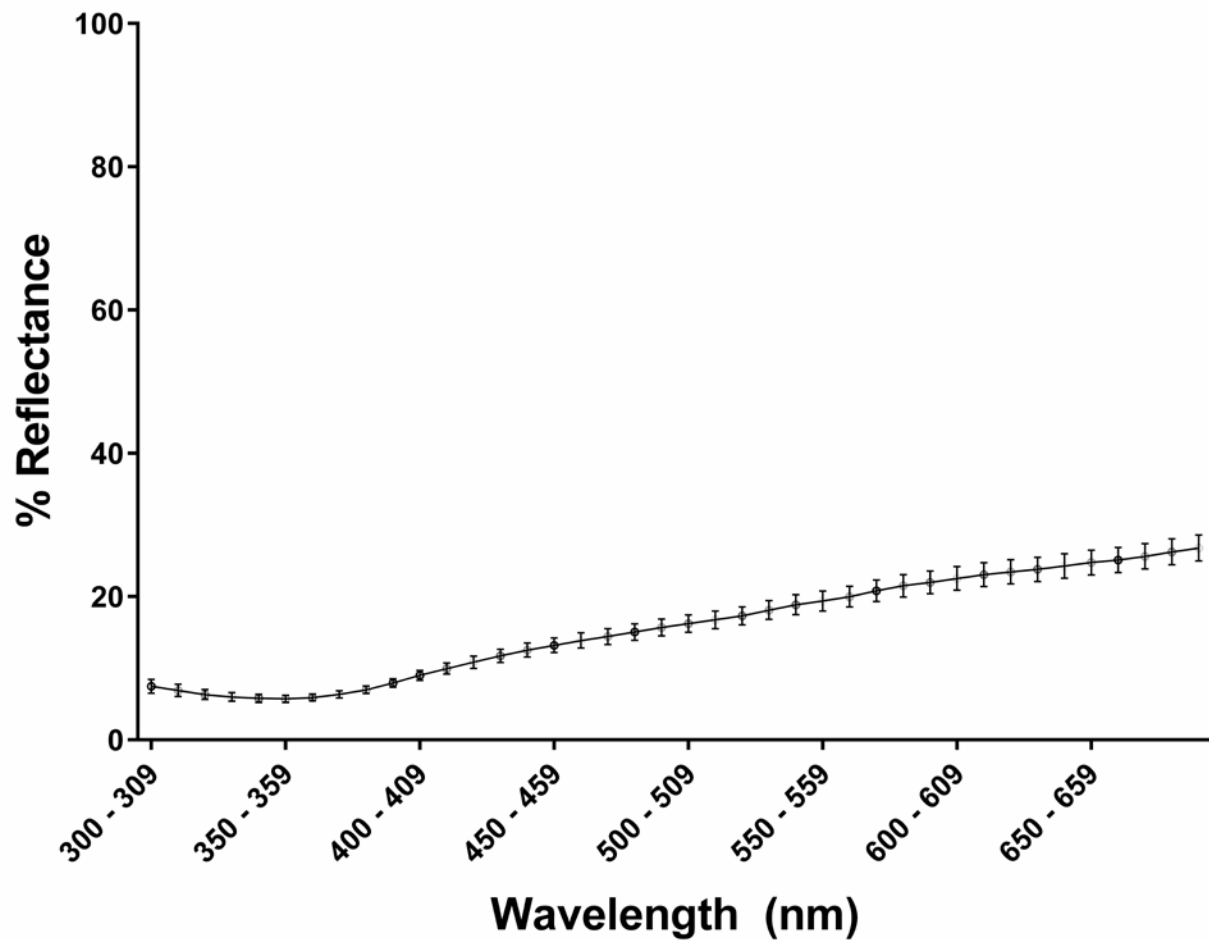

**Fig. S1.** Mean (S.E.M.) reflectance spectra across the avian visible spectrum of all natural nests. Data are batched over 10 nm intervals.

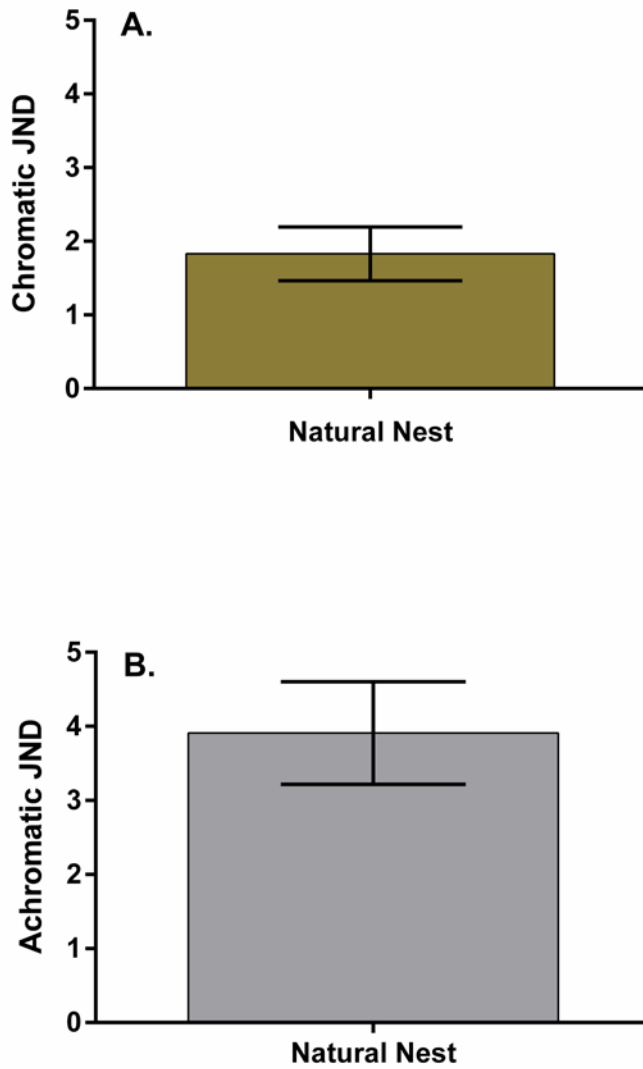

**Fig. S2.** Mean (S.E.M.) chromatic (A) and achromatic (B) JNDs between randomly-paired natural robin nest linings.

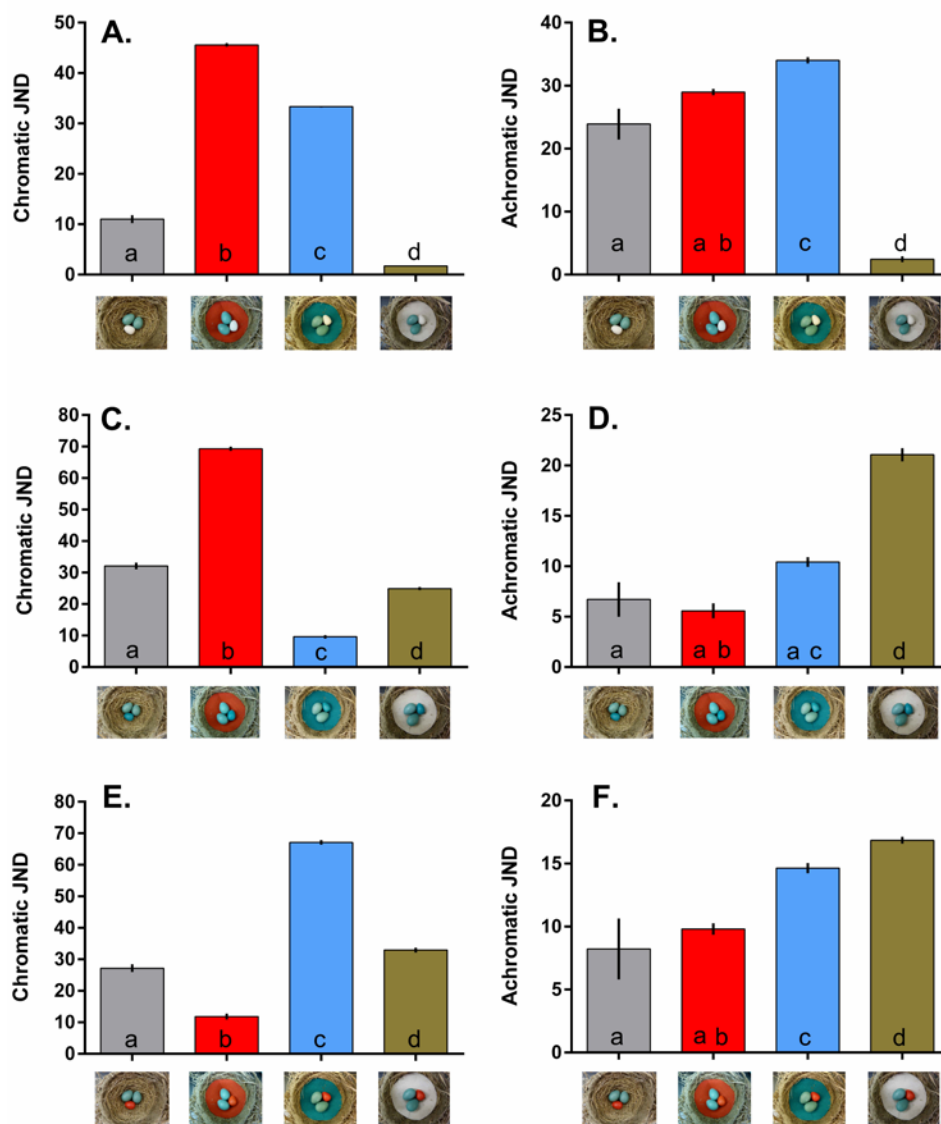

**Fig. S3.** (A-F) Mean (S.E.M.) chromatic (A, C, E) and achromatic (B, D, F) contrasts between experimental eggs and all nest linings using a VS visual perceptual model. Images below each column indicate the experimental egg-nest lining pair measured (from left to right: natural nest, red nest, robin-mimetic nest, beige nest). All comparisons are made using Kruskal-Wallis rank sums tests followed by Wilcoxon pairwise comparisons. Significant pairwise comparisons are indicated by letters in/above each column – columns bearing the same letter are not significantly different. In (A) and (B), beige egg-nest lining chromatic ( $H_{(3)} = 45.00$ ,  $p < 0.0001$ ) and achromatic ( $H_{(3)} = 42.29$ ,  $p < 0.0001$ ) contrasts were significant. In (C) and (D), robin-mimetic egg-nest lining chromatic ( $H_{(3)} = 43.86$ ,  $p < 0.0001$ ) and achromatic ( $H_{(3)} = 38.65$ ,  $p < 0.0001$ ) contrasts were significant. In (E) and (F), red egg-nest lining chromatic ( $H_{(3)} = 44.56$ ,  $p < 0.0001$ ) and achromatic ( $H_{(3)} = 36.83$ ,  $p < 0.0001$ ) contrasts were significant.

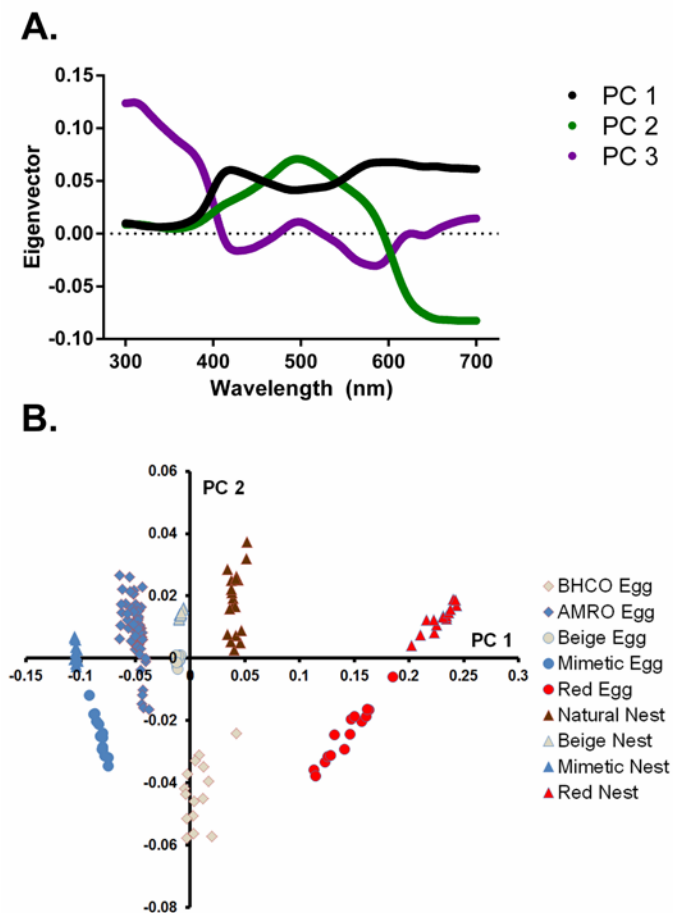

**Fig. S4.** (A) Eigenvectors as a function of wavelength for the first three PCs from PCA on eggs and nests. PC 1, PC 2, and PC 3 refer to principal components 1, 2, and 3, respectively. (B) PC score plot for PC 2 and PC 3 following principal components analysis of interpolated reflectance spectra of eggs and nests. The first three principal components explained over 98% of the variance in the model. PC 1 is a positive correlate of achromatic variation (Cherry and Bennett, 2001; Endler and Mielke, 2005), and explained 67.14% of the variance in our data. PC 2 (28.53 % of the variance) and PC 3 (2.93% of the variance) were used as descriptors of chromatic variation. Distances in (a)chromatic metrics between eggs and nests were calculated using both PC 1 (for achromatic distances) and PC 2 and PC 3 scores (for chromatic distances, by calculating Euclidian distances).

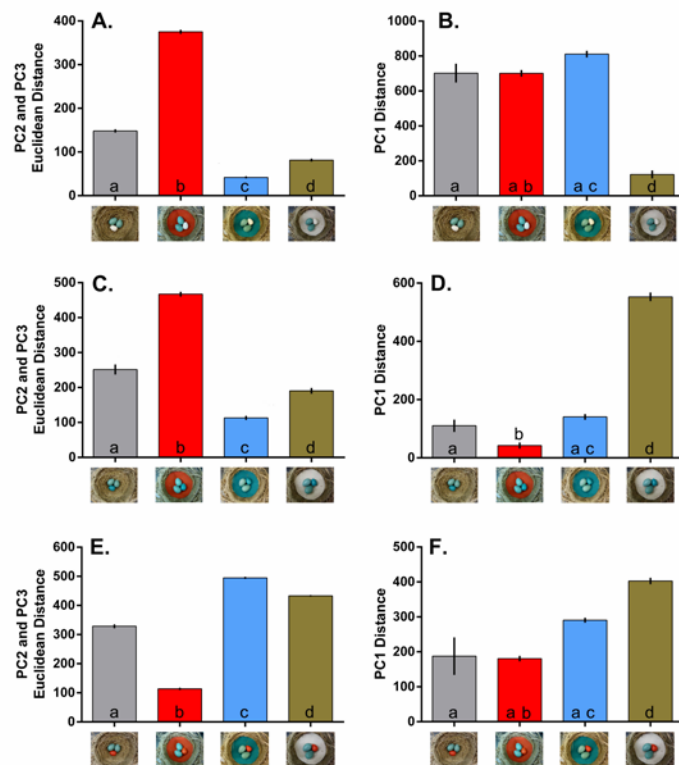

**Fig. S5.** (A-F) Mean (S.E.M) Euclidean distance between PC 2 and PC 3 scores (A, C, E) and PC 1 distance scores (B, D, F) from PCA on interpolated spectra between experimental eggs and all nest linings. Images below each column indicate the experimental egg-nest lining pair measured (from left to right: natural nest, red nest, robin-mimetic nest, beige nest). All comparisons made using Kruskal-Wallis rank sums tests followed by Wilcoxon pairwise comparisons. Significant pairwise comparisons indicated by letters in/above each column – columns bearing the same letter are not significantly different. In (A) and (B), beige egg-nest PC 2 – PC 3 Euclidean distances ( $H_{(3)} = 45.00$ ,  $p < 0.0001$ ) and PC 1 distances ( $H_{(3)} = 35.84$ ,  $p < 0.0001$ ) were significant. In (C) and (D), robin-mimetic egg-nest PC 2 – PC 3 Euclidean distances ( $H_{(3)} = 43.43$ ,  $p < 0.0001$ ) and PC 1 distances ( $H_{(3)} = 40.33$ ,  $p < 0.0001$ ) were significant. In (E) and (F), red egg-nest PC 2 – PC 3 Euclidean distances ( $H_{(3)} = 45.00$ ,  $p < 0.0001$ ) and PC 1 distances ( $H_{(3)} = 41.24$ ,  $p < 0.0001$ ) were significant.

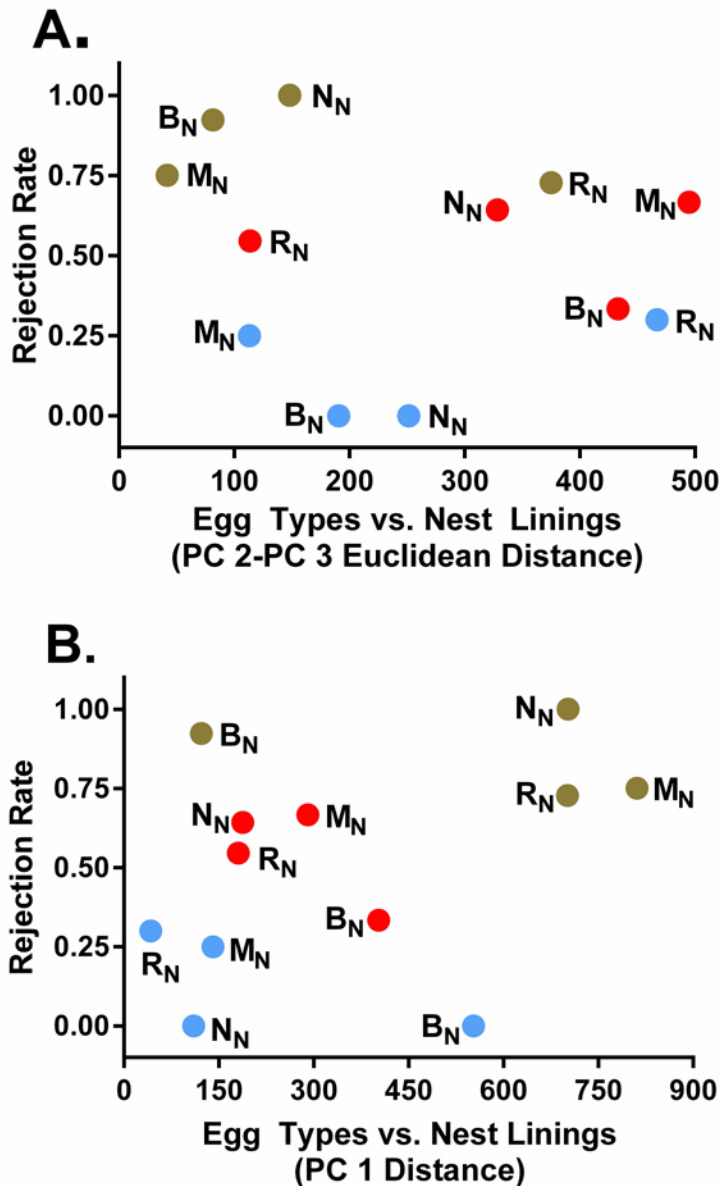

**Fig. S6.** The effect of model egg and nest lining color manipulations on egg rejection rates by American robins. In (A) and (B), data points refer to egg colors (tan = beige, blue = robin-mimetic, and red = red) and text refers to nest linings (B<sub>N</sub> = beige nest, M<sub>N</sub> = robin-mimetic nest, and R<sub>N</sub> = red nest). (A) The relationship between PC 2 and PC 3 Euclidean distances between eggs and nest linings and rejection rate was not significant ( $F_{(1, 10)} = 0.37$ ,  $p = 0.56$ ,  $R^2 = 0.04$ ). (B) The relationship between PC 1 distances between eggs and nest linings and rejection rate was also not significant ( $F_{(1, 10)} = 1.48$ ,  $p = 0.25$ ,  $R^2 = 0.13$ ).

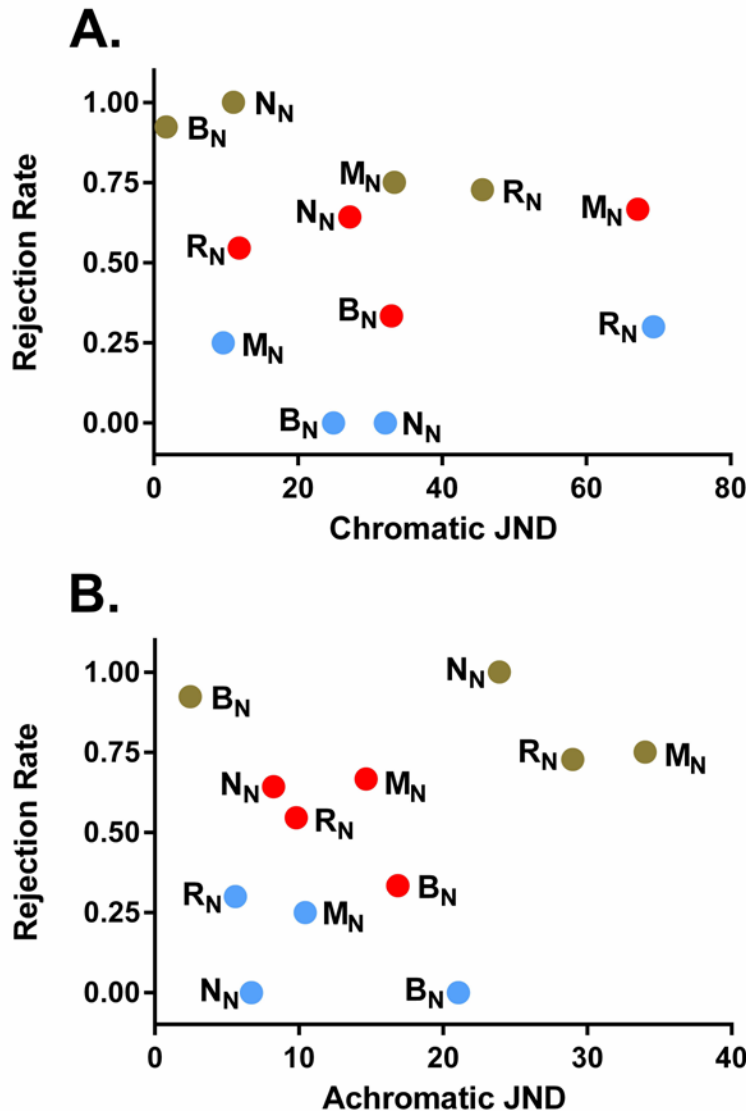

**Fig. S7.** The effect of model egg and nest lining color manipulations on egg rejection rates by American robins following a VS visual model. In (A) and (B), data points refer to egg colors (tan = beige, blue = robin-mimetic, and red = red) and text refers to nest linings (B<sub>N</sub> = beige nest, M<sub>N</sub> = robin-mimetic nest, and R<sub>N</sub> = red nest). (A) The relationship between chromatic JND of eggs-nest linings and rejection rate was not significant ( $F_{(1, 10)} = 0.32$ ,  $p = 0.58$ ;  $R^2 = 0.03$ ). (B) The relationship between achromatic JND of eggs-nest linings and rejection rate was also not significant ( $F_{(1, 10)} = 0.75$ ,  $p = 0.41$ ,  $R^2 = 0.07$ ).

**Table S1.** The three principal components (PCs) from principal components analysis of interpolated egg and nest spectra that explain over 98% of the variance in spectral data.

| <b>PC</b> | <b>Eigenvalue</b> | <b>Percent Variance Explained</b> | <b>Cumulative Percent</b> | <b><math>\chi^2</math></b> | <b>Df</b> | <b>P-value</b> |
|-----------|-------------------|-----------------------------------|---------------------------|----------------------------|-----------|----------------|
| 1         | 58737.17          | 67.14                             | 67.14                     | 1504174                    | 80600     | < 0.0001*      |
| 2         | 24958.96          | 28.53                             | 95.67                     | 1416452                    | 80199     | < 0.0001*      |
| 3         | 2563.19           | 2.93                              | 98.60                     | 1256024                    | 79799     | < 0.0001*      |



**Table S2.** Generalized Linear Mixed Model (GLMM) fits with binomial distribution (outcome variable: accept/reject) of parameters used to assess individual robins' acceptance/rejection of parasitic eggs irrespective of egg/nest treatments. In (A), nest sites at which more than one parasitism trial was conducted were included as a nested predictor within nest lining color to test for individuals' reactions to parasitism, irrespective of nest and egg type. In (B), the analysis from (A) was re-run with two sites removed (one significant site and one site approaching significance).

---

| <b>(A) Multiple experiments</b> |           |                            |                |
|---------------------------------|-----------|----------------------------|----------------|
| <b>Predictor</b>                | <b>df</b> | <b><math>\chi^2</math></b> | <b>p-value</b> |
| Whole model                     | 33        | 70.25                      | 0.0002*        |
| Egg color                       | 2         | 27.86                      | < 0.0001*      |
| Site [Nest color]               | 33        | 44.23                      | 0.03*          |
| Clutch size                     | 1         | 0.03                       | 0.85           |
| Presentation order              | 1         | 1.10                       | 0.30           |
| Experiment date                 | 1         | 0.00                       | 1.00           |

  

| <b>(B) Multiple experiments, excluding significant sites from (A)</b> |           |                            |                |
|-----------------------------------------------------------------------|-----------|----------------------------|----------------|
| <b>Predictor</b>                                                      | <b>df</b> | <b><math>\chi^2</math></b> | <b>p-value</b> |
| Whole model                                                           | 31        | 63.89                      | 0.0005*        |
| Egg color                                                             | 2         | 27.03                      | < 0.0001*      |
| Site [Nest color]                                                     | 26        | 36.17                      | 0.09           |
| Clutch size                                                           | 1         | 0.00                       | 1.00           |
| Presentation order                                                    | 1         | 2.34                       | 0.13           |
| Experiment date                                                       | 1         | 0.05                       | 0.83           |

---
